# Supplementary material for: Association of Medicaid vs Marketplace Eligibility on Maternal Coverage and Access With Prenatal and Postpartum Care
Source: PubMed Central journal article supplement (PMC8649838; doi:10.1001/jamanetworkopen.2021.37383), 2021-12-06
Supplement: jamanetwopen-e2137383-s001.pdf [file jamanetwopen-e2137383-s001.pdf]

## Supplementary Online Content

Eliason EL, Daw JR, Allen HL. Association of Medicaid vs marketplace eligibility on maternal coverage and access with prenatal and postpartum care. *JAMA Netw Open*. 2021;4(12):e2137383. doi:10.1001/jamanetworkopen.2021.37383

**eTable 1.** List of States Included and Insurance Eligibility Category for Income 100%-138% FPL During Study Period

**eTable 2.** Difference-in-Difference Model and Assumptions

**eFigure 1.** Unadjusted Trends in Preconception and Postpartum Medicaid and Private Coverage Among Low-Income Women 100%-138% FPL, by Eligibility for Medicaid or Marketplace Insurance

**eTable 3.** Prepolicy Placebo Tests

**eFigure 2.** Plots of Placebo Test Coefficients

**eTable 4.** Estimates of the Effects of Medicaid Versus Marketplace Eligibility on Maternal Coverage and Access to Prenatal and Postpartum Care, Using Lower-Bound and Upper-Bound Income Specifications

**eTable 5.** Estimates of the Effects of Medicaid Versus Marketplace Eligibility on Maternal Coverage and Access to Prenatal and Postpartum Care, Including Transition Year

**eTable 6.** Estimates of the Effects of Medicaid Versus Marketplace Eligibility on Maternal Coverage and Access to Prenatal and Postpartum Care, Excluding Women Aged 18-26 Years

**eTable 7.** Estimates of the Effects of Medicaid Versus Marketplace Eligibility on Maternal Coverage and Access to Prenatal and Postpartum Care, Omitting States with Generous Pre-ACA Medicaid Eligibility

**eTable 8.** Estimates of the Effects of Medicaid Versus Marketplace Eligibility on Maternal Coverage and Access to Prenatal and Postpartum Care, Complete Case Analysis

**eTable 9.** Estimates of the Effects of Medicaid Versus Marketplace Eligibility on Maternal Coverage and Access to Prenatal and Postpartum Care, Excluding Women with PRAMS Follow-up within 2 Months

**eTable 10.** Estimates of the Effects of Medicaid Versus Marketplace Eligibility on Coverage at Delivery

**eTable 11.** Estimates of the Effects of Medicaid Versus Marketplace Eligibility on Number of Prenatal Care Visits

**eTable 12.** PRAMS Private Coverage Variables Over Time

This supplementary material has been provided by the authors to give readers additional information about their work.

**eTable1. List of States Included and Insurance Eligibility Category for Income 100%-138% FPL during Study Period**

| <b>Medicaid Expansion States</b>                                                                                           | <b>Marketplace States</b>                 |
|----------------------------------------------------------------------------------------------------------------------------|-------------------------------------------|
| Colorado, Delaware, Massachusetts, New Jersey, New Mexico, New York City, Pennsylvania, Vermont, Washington, West Virginia | Maine, Missouri, Utah, Wisconsin, Wyoming |

**eTable2. Difference-in-Difference Model and Assumptions**

Our model is specified below:

$$y_{it} = \beta_0 + \beta_1(\text{Post*Expansion})_{it} + (\text{YearFE})_t + (\text{StateFE})_i + \gamma'x_{it} + \epsilon_{it}$$

The  $\beta_1$  coefficient estimates changes in outcomes among women gaining Medicaid eligibility relative to Marketplace eligibility after policy implementation.  $Y_{it}$  represents the dependent variable.  $\gamma'x_{it}$  is a vector of control variables, including the state unemployment rate for women from the Bureau of Labor Statistics, mother’s age, marital status, race, Hispanic ethnicity, and high school educational attainment.

The table below presents an analysis of the difference-in-differences assumption that the trends prior to policy implementation are similar for mothers gaining Medicaid and Marketplace eligibility. This pre-policy trend comparison follows the approach of other health insurance studies that tests pre-trends for difference-in-differences models. Analysis is limited to prior to 2014 to compare parallel trends in the pre-period, and each outcome is modeled as an interaction of a linear time trend and treatment group status to assess significant differences in trends prior to the policy implementation. The  $\beta_2$  coefficient, presented in the table, indicates any significant difference in pre-policy trends between mothers gaining Medicaid and Marketplace eligibility, as specified:

$$y_{it} = \beta_0 + \beta_1\text{LinearTimeTrend}_t + \beta_2\text{TreatmentStatus}_i * \text{LinearTimeTrend}_t + (\text{StateFE})_i + \gamma'x_{it} + \epsilon_{it}$$

| Dependent Variable:                | Trend Difference | P-Value |
|------------------------------------|------------------|---------|
| Preconception Medicaid Coverage    | -0.006           | 0.788   |
| Preconception Private Insurance    | -0.015           | 0.554   |
| No Preconception Insurance         | 0.015            | 0.550   |
| Postpartum Medicaid Coverage       | 0.061            | 0.210   |
| Postpartum Private Insurance       | -0.005           | 0.910   |
| No Postpartum Insurance            | -0.052           | 0.215   |
| Early Prenatal Care                | 0.005            | 0.834   |
| Adequate Prenatal Care             | 0.027            | 0.289   |
| Postpartum Check-Up                | -0.008           | 0.662   |
| Effective Postpartum Contraception | -0.019           | 0.396   |

Notes: Authors’ analysis of Pregnancy Risk Assessment Monitoring System data from fourteen states and New York City. Sample includes low-income women 100-138 percent of the federal poverty level. Data are weighted using PRAMS sample weights.

**eFigure 1. Unadjusted Trends in Preconception and Postpartum Medicaid and Private Coverage among Low-Income Women 100-138% FPL, by Eligibility for Medicaid or Marketplace Insurance**

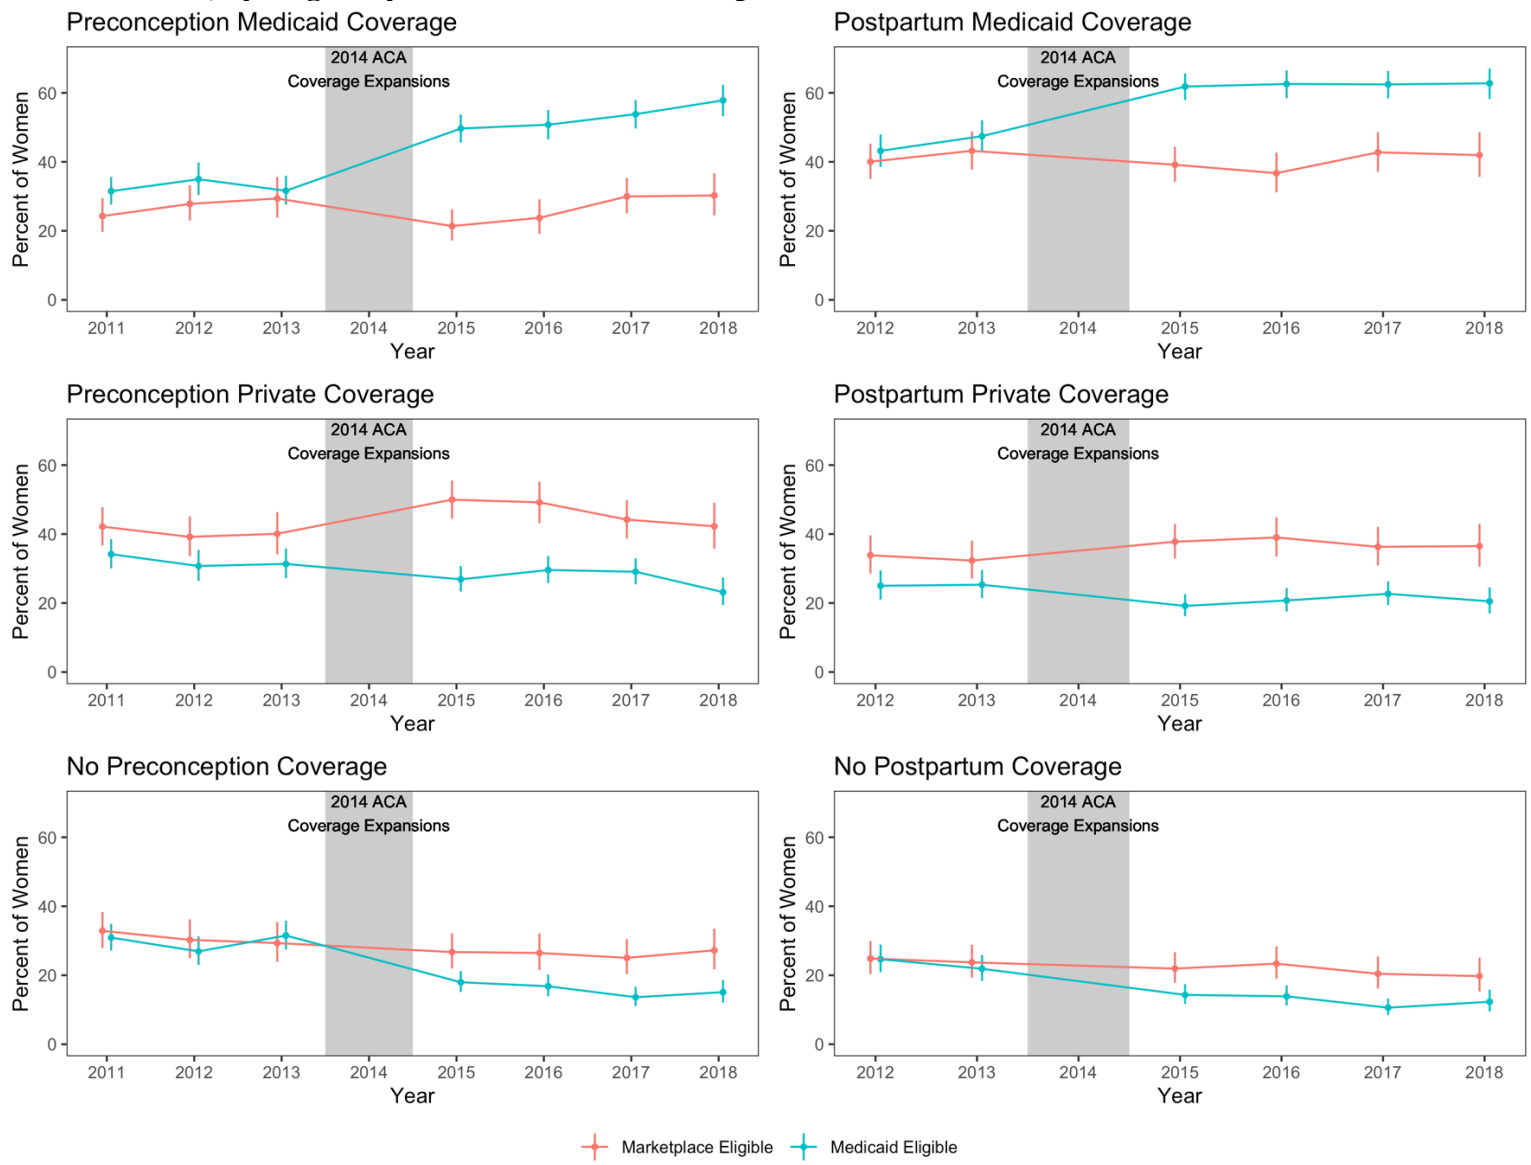

**eTable3. Prepolicy Placebo Tests**

| Dependent Variable:                |      | Coefficient | Lower bound<br>95% CI | Upper bound<br>95% CI | F-Statistic | <i>P-Value</i> |
|------------------------------------|------|-------------|-----------------------|-----------------------|-------------|----------------|
| Preconception Coverage             |      |             |                       |                       |             |                |
| Medicaid                           | 2011 | 1.08        | -2.82                 | 4.99                  | 0.30        | 0.748          |
|                                    | 2012 | 0.81        | -6.54                 | 8.17                  |             |                |
| Private                            | 2011 | 3.29        | -6.55                 | 13.13                 | 0.40        | 0.677          |
|                                    | 2012 | 2.89        | -7.07                 | 12.85                 |             |                |
| None                               | 2011 | -2.83       | -10.57                | 4.91                  | 0.33        | 0.725          |
|                                    | 2012 | -2.82       | -14.29                | 8.65                  |             |                |
| Postpartum Coverage                |      |             |                       |                       |             |                |
| Medicaid                           | 2012 | -6.14       | -15.73                | 3.45                  | 1.57        | 0.210          |
| Private                            | 2012 | 0.55        | -9.03                 | 10.13                 | 0.01        | 0.910          |
| None                               | 2012 | 5.25        | -3.04                 | 1.35                  | 1.54        | 0.215          |
| Access and Childbirth Outcomes     |      |             |                       |                       |             |                |
| Early Prenatal Care                | 2011 | -1.10       | -8.40                 | 6.21                  | 0.54        | 0.594          |
|                                    | 2012 | -3.41       | -10.86                | 4.04                  |             |                |
| Adequate Prenatal Care             | 2011 | -5.93       | -13.88                | 2.01                  | 1.60        | 0.237          |
|                                    | 2012 | -0.50       | -13.04                | 12.03                 |             |                |
| Postpartum Check-Up                | 2011 | 1.04        | -5.07                 | 7.15                  | 3.37        | 0.064          |
|                                    | 2012 | 4.35        | -3.06                 | 11.18                 |             |                |
| Effective Postpartum Contraception | 2011 | 2.21        | -25.42                | 29.85                 | 0.96        | 0.409          |
|                                    | 2012 | -9.95       | -25.57                | 5.67                  |             |                |

Notes: Authors' analysis of Pregnancy Risk Assessment Monitoring System data from fourteen states and New York City. Sample includes low-income women 100-138 percent of the federal poverty level. Placebo test coefficients represent the difference in the outcome in Medicaid states relative to Marketplace states in each year compared to the last year of the pre-policy period (2013). Data are weighted using PRAMS sample weights. Estimates expressed as percentage points. Estimates are adjusted for mother's age, marital status, race/ethnicity, educational attainment, state level rates of unemployment for women, and state and year fixed effects. F-statistics represent joint tests of the null hypothesis that all pre-policy interaction terms are equal to zero.

### eFigure2. Plots of Placebo Test Coefficients

Estimates expressed as percentage points. Error bars represent 95% CIs. Placebo test coefficients represent the difference in the outcome in Medicaid states relative to Marketplace states in each year compared to the last year of the pre-policy period (2013). Data are weighted using PRAMS sample weights. Estimates are adjusted for mother's age, marital status, race/ethnicity, educational attainment, state level rates of unemployment for women, and state and year fixed effects. Authors' analysis of Pregnancy Risk Assessment Monitoring System data from fourteen states and New York City. Sample includes low-income women 100-138 percent of the federal poverty level.

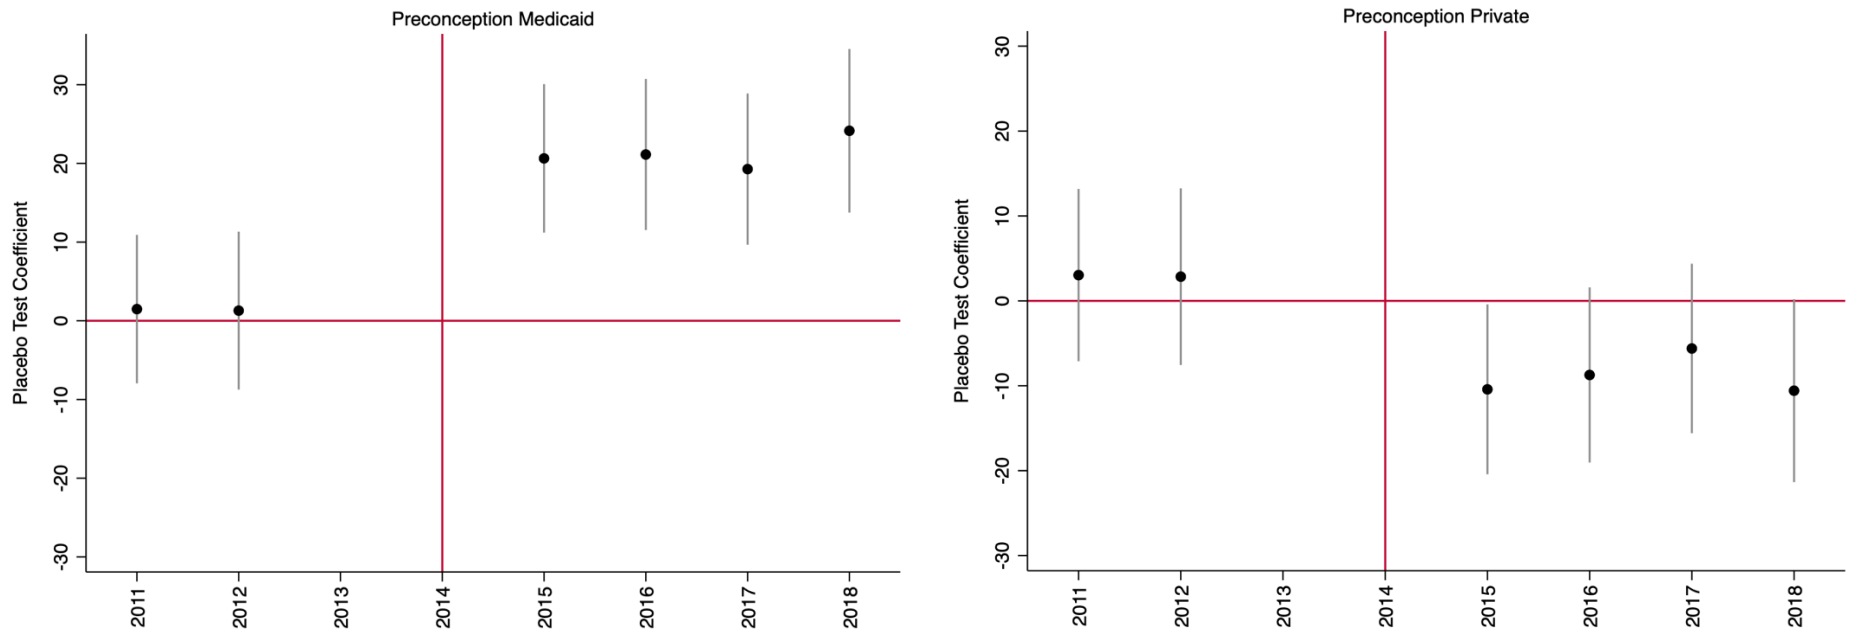

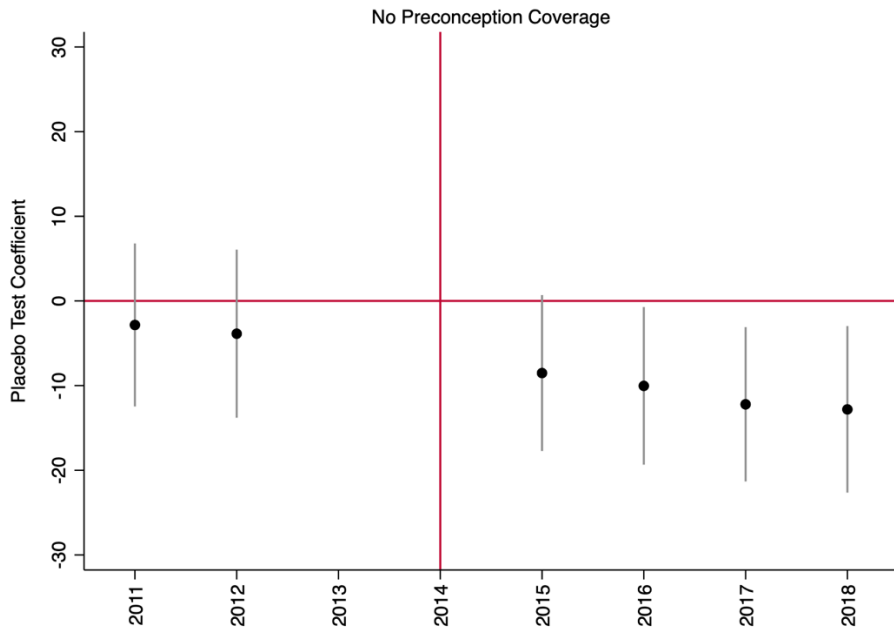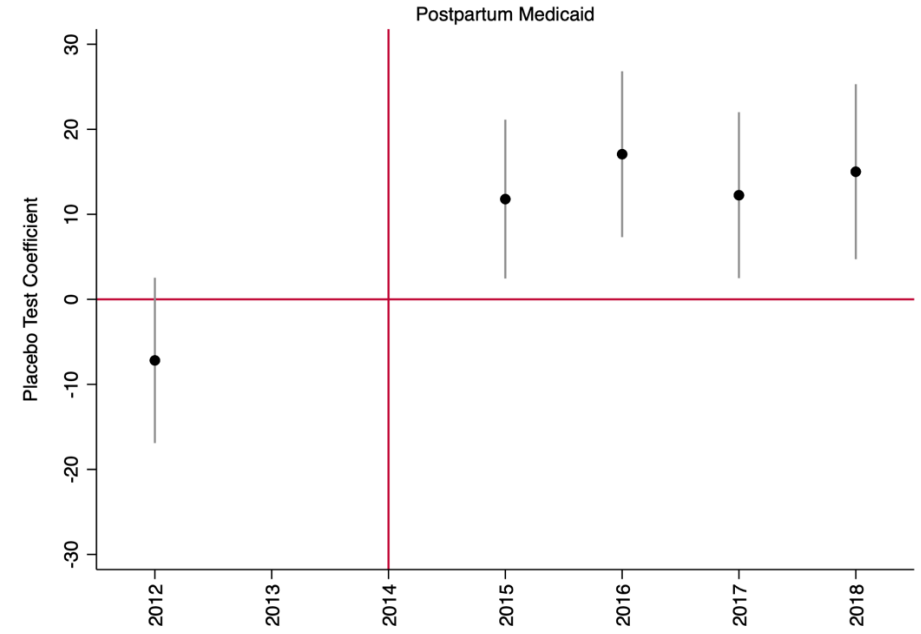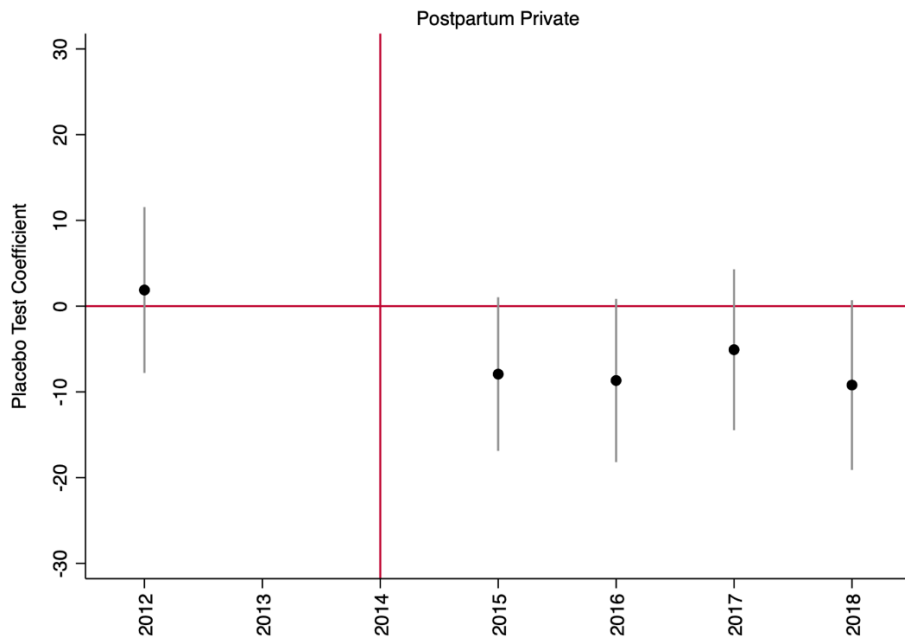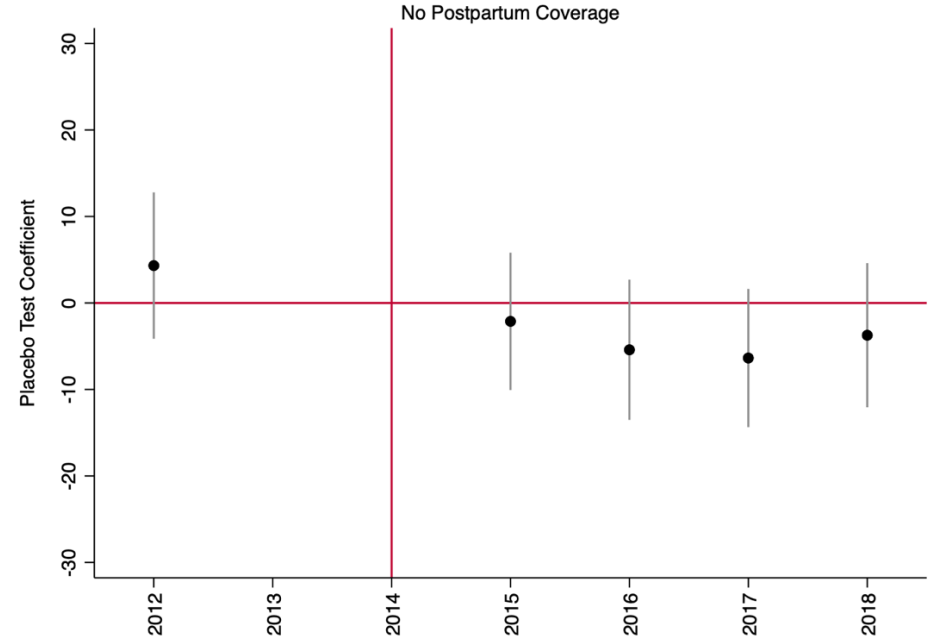

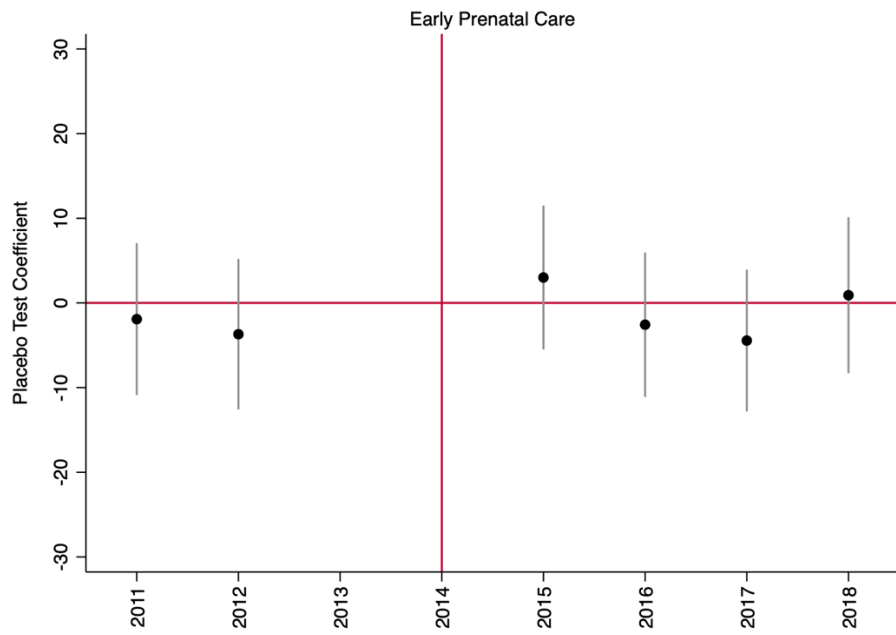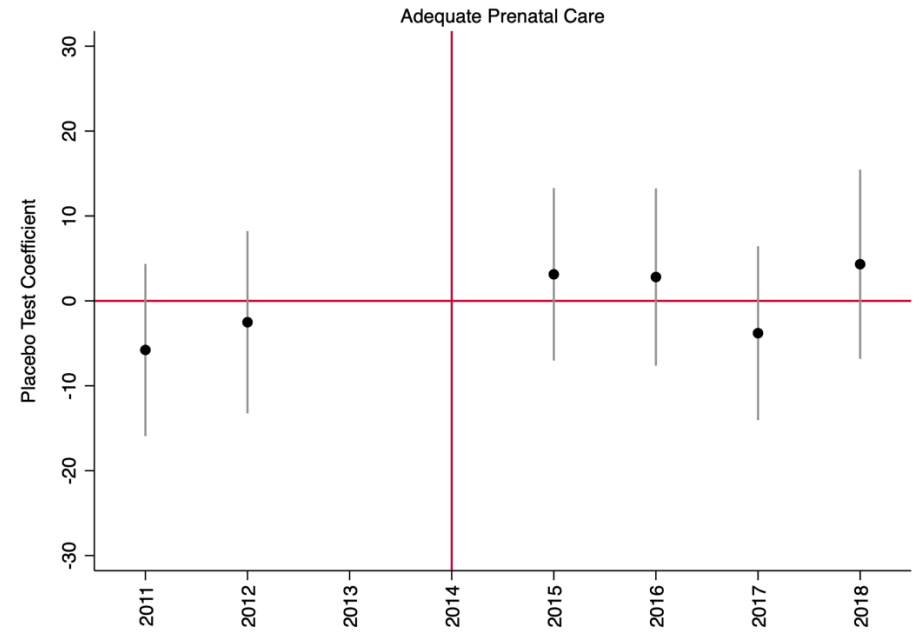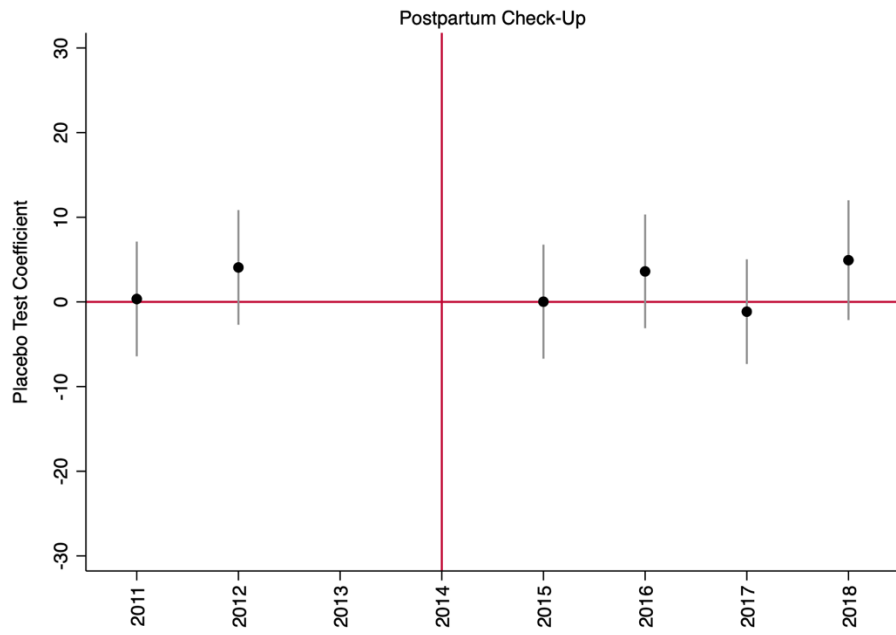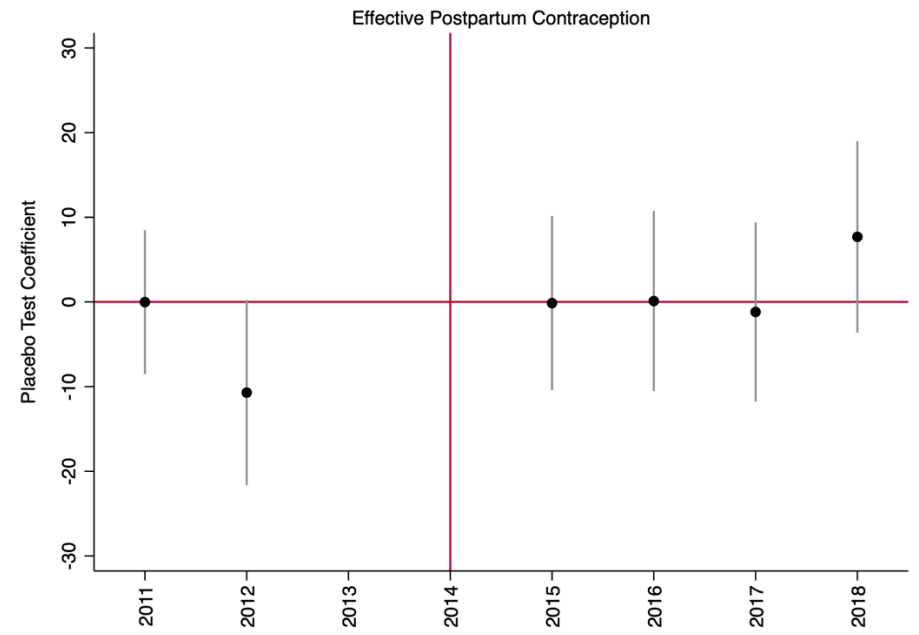



**eTable 4. Estimates of the Effects of Medicaid versus Marketplace Eligibility on Maternal Coverage and Access to Prenatal and Postpartum Care, Using Lower-Bound and Upper-Bound Income Specifications**

| Dependent Variable:                | Adjusted Effects of Medicaid versus Marketplace Eligibility |                                                 |
|------------------------------------|-------------------------------------------------------------|-------------------------------------------------|
|                                    | Lower-Bound Income Specifications<br>(N=10,588)             | Upper-Bound Income Specifications<br>(N=15,449) |
| <b>Preconception Coverage</b>      |                                                             |                                                 |
| Medicaid                           | 15.3*                                                       | 20.5**                                          |
|                                    | (8.9, 24.6)                                                 | (12.6, 31.1)                                    |
|                                    | <b>0.010</b>                                                | <b>0.005</b>                                    |
| Private                            | -5.0                                                        | -11.1**                                         |
|                                    | (-14.6, 1.5)                                                | (-17.2, -5.7)                                   |
|                                    | 0.307                                                       | <b>0.005</b>                                    |
| None                               | -10.0*                                                      | -9.7*                                           |
|                                    | (-20.2, -2.1)                                               | (-22.0, -0.8)                                   |
|                                    | <b>0.018</b>                                                | <b>0.040</b>                                    |
| <b>Postpartum Coverage</b>         |                                                             |                                                 |
| Medicaid                           | 17.8**                                                      | 15.8***                                         |
|                                    | (6.8, 29.5)                                                 | (3.4, 30.4)                                     |
|                                    | <b>0.002</b>                                                | <b>0.000</b>                                    |
| Private                            | -9.0                                                        | -6.6                                            |
|                                    | (-20.5, 1.2)                                                | (-15.5, 2.0)                                    |
|                                    | 0.101                                                       | 0.237                                           |
| None                               | -7.0†                                                       | -7.4†                                           |
|                                    | (-19.7, 0.8)                                                | (-21.0, 0.5)                                    |
|                                    | 0.062                                                       | 0.063                                           |
| Early Prenatal Care                | -1.0                                                        | 2.8                                             |
|                                    | (-3.6, 2.0)                                                 | (-1.6, 8.9)                                     |
|                                    | 0.441                                                       | 0.224                                           |
| Adequate Prenatal Care             | -1.7                                                        | 3.3                                             |
|                                    | (-7.3, 5.2)                                                 | (-1.7, 9.1)                                     |
|                                    | 0.447                                                       | 0.113                                           |
| Postpartum Check-Up                | -1.9                                                        | 2.5                                             |
|                                    | (-9.2, 3.13)                                                | (-1.3, 6.6)                                     |
|                                    | 0.666                                                       | 0.323                                           |
| Effective Postpartum Contraception | 5.0                                                         | 2.8                                             |
|                                    | (-16.2, 44.4)                                               | (-7.7, 20.8)                                    |
|                                    | 0.780                                                       | 0.654                                           |

Notes: Authors' analysis of Pregnancy Risk Assessment Monitoring System data from fourteen states and New York City. Sample includes low-income women 100-138 percent of the federal poverty level. Data are weighted using PRAMS sample weights. Estimates are presented as percentage points. Model is adjusted for marital status, race/ethnicity, educational attainment, state level rates of unemployment for women, and state and year fixed effects. P-values and confidence intervals are derived from wild bootstrap cluster standard errors by state. Boldface indicates  $p < 0.05$ . † $p < 0.10$ , \* $p < 0.05$ , \*\* $p < 0.01$ , \*\*\* $p < 0.001$

**eTable 5. Estimates of the Effects of Medicaid versus Marketplace Eligibility on Maternal Coverage and Access to Prenatal and Postpartum Care, Including Transition Year**

| Dependent Variable:                | Effects of Medicaid versus Marketplace Eligibility |                                     |
|------------------------------------|----------------------------------------------------|-------------------------------------|
|                                    | Unadjusted Difference-in-Difference                | Unadjusted Difference-in-Difference |
| Preconception Coverage             |                                                    |                                     |
| Medicaid                           | 12.8†                                              | 12.8†                               |
|                                    | (-0.1, 25.9)                                       | (-1.4, 25.5)                        |
|                                    | 0.051                                              | 0.058                               |
| Private                            | -7.6**                                             | -8.0*                               |
|                                    | (-12.5, -1.9)                                      | (-12.5, -0.3)                       |
|                                    | <b>0.005</b>                                       | <b>0.045</b>                        |
| None                               | -4.7                                               | -4.4                                |
|                                    | (-15.0, 2.3)                                       | (-14.8, 3.6)                        |
|                                    | 0.194                                              | 0.273                               |
| Postpartum Coverage                |                                                    |                                     |
| Medicaid                           | 13.1**                                             | 12.0**                              |
|                                    | (3.1, 34.0)                                        | (2.0, 31.5)                         |
|                                    | <b>0.008</b>                                       | <b>0.007</b>                        |
| Private                            | -7.6                                               | -7.7                                |
|                                    | (-15.7, 3.8)                                       | (-15.5, 3.6)                        |
|                                    | 0.127                                              | 0.150                               |
| None                               | -3.9                                               | -2.9                                |
|                                    | (-14.0, 4.7)                                       | (-11.9, 5.3)                        |
|                                    | 0.351                                              | 0.477                               |
| Early Prenatal Care                | 1.2                                                | 0.7                                 |
|                                    | (-3.9, 5.4)                                        | (-4.6, 5.1)                         |
|                                    | 0.613                                              | 0.763                               |
| Adequate Prenatal Care             | 5.7*                                               | 5.2*                                |
|                                    | (0.2, 10.7)                                        | (0.1, 10.1)                         |
|                                    | <b>0.044</b>                                       | <b>0.044</b>                        |
| Postpartum Check-Up                | 0.6                                                | 0.2                                 |
|                                    | (-1.8, 3.9)                                        | (-2.0, 3.7)                         |
|                                    | 0.685                                              | 0.884                               |
| Effective Postpartum Contraception | 4.0                                                | 4.0                                 |
|                                    | (-5.8, 15.8)                                       | (-5.1, 15.9)                        |
|                                    | 0.393                                              | 0.380                               |

Notes: Authors' analysis of Pregnancy Risk Assessment Monitoring System data from fourteen states and New York City. Sample includes low-income women 100-138 percent of the federal poverty level. Data are weighted using PRAMS sample weights. Estimates are presented as percentage points. Model is adjusted for marital status, race/ethnicity, educational attainment, state level rates of unemployment for women, and state and year fixed effects. P-values and confidence intervals are derived from wild bootstrap cluster standard errors by state. Boldface indicates  $p < 0.05$ . † $p < 0.10$ , \* $p < 0.05$ , \*\* $p < 0.01$ , \*\*\* $p < 0.001$

**eTable 6. Estimates of the Effects of Medicaid versus Marketplace Eligibility on Maternal Coverage and Access to Prenatal and Postpartum Care, Excluding Women Aged 18-26 Years**

| Dependent Variable:                   | Medicaid Non-expansion States<br>(Marketplace Eligible) |                          | Medicaid Expansion States<br>(Medicaid Eligible) |                          | Effects of Medicaid versus Marketplace Eligibility  |                                                |
|---------------------------------------|---------------------------------------------------------|--------------------------|--------------------------------------------------|--------------------------|-----------------------------------------------------|------------------------------------------------|
|                                       | Pre-policy<br>(N=821)                                   | Post-policy<br>(N=1,214) | Pre-policy<br>(N=1,875)                          | Post-policy<br>(N=2,624) | Unadjusted<br>Difference-in-<br>Difference Estimate | Adjusted Difference-<br>in-Difference Estimate |
| <b>Preconception Coverage</b>         |                                                         |                          |                                                  |                          |                                                     |                                                |
| Medicaid                              | 25.7                                                    | 25.8                     | 33.0                                             | 51.9                     | 13.1**<br>(2.8, 25.7)                               | 20.1***<br>(9.8, 33.1)                         |
|                                       |                                                         |                          |                                                  |                          | <b>0.008</b>                                        | <b>0.000</b>                                   |
| Private                               | 43.6                                                    | 46.1                     | 32.7                                             | 26.5                     | -8.5**<br>(-13.6, -4.2)                             | -10.0*<br>(-13.4, -4.4)                        |
|                                       |                                                         |                          |                                                  |                          | <b>0.003</b>                                        | <b>0.010</b>                                   |
| None                                  | 29.2                                                    | 27.6                     | 28.2                                             | 17.2                     | -4.6<br>(-16.9, 4.9)                                | -9.7†<br>(-23.5, 1.9)                          |
|                                       |                                                         |                          |                                                  |                          | 0.372                                               | 0.059                                          |
| <b>Postpartum Coverage</b>            |                                                         |                          |                                                  |                          |                                                     |                                                |
| Medicaid                              | 36.9                                                    | 37.9                     | 44.7                                             | 59.0                     | 12.5***<br>(5.0, 25.2)                              | 14.3*<br>(2.8, 32.5)                           |
|                                       |                                                         |                          |                                                  |                          | <b>0.000</b>                                        | <b>0.010</b>                                   |
| Private                               | 36.5                                                    | 39.5                     | 24.7                                             | 21.9                     | -6.2<br>(-15.5, 4.9)                                | -7.1<br>(-18.5, 4.3)                           |
|                                       |                                                         |                          |                                                  |                          | 0.214                                               | 0.267                                          |
| None                                  | 26.3                                                    | 22.0                     | 21.6                                             | 14.4                     | -3.2<br>(-8.4, 5.5)                                 | -2.9<br>(-13.1, 9.3)                           |
|                                       |                                                         |                          |                                                  |                          | 0.217                                               | 0.446                                          |
| <b>Access and Childbirth Outcomes</b> |                                                         |                          |                                                  |                          |                                                     |                                                |
| Early Prenatal Care                   | 81.7                                                    | 83.6                     | 80.1                                             | 83.8                     | -0.1<br>(-5.6, 7.8)                                 | 1.7<br>(-2.3, 8.9)                             |
|                                       |                                                         |                          |                                                  |                          | 0.968                                               | 0.465                                          |

|                                    |      |      |      |      |              |               |
|------------------------------------|------|------|------|------|--------------|---------------|
| Kessner Prenatal Care Index        | 78.3 | 77.0 | 67.3 | 70.7 | 5.7†         | 4.3†          |
|                                    |      |      |      |      | (-0.8, 13.2) | (-0.1, 9.4)   |
|                                    |      |      |      |      | 0.080        | 0.069         |
| Postpartum Check-Up                | 91.5 | 88.5 | 90.3 | 89.1 | 1.4          | 0.9           |
|                                    |      |      |      |      | (-2.4, 4.5)  | (-4.5, 4.8)   |
|                                    |      |      |      |      | 0.447        | 0.723         |
| Effective Postpartum Contraception | 38.6 | 51.3 | 31.4 | 48.4 | 2.2          | 5.2           |
|                                    |      |      |      |      | (-9.9, 24.8) | (-11.4, 30.4) |
|                                    |      |      |      |      | 0.780        | 0.594         |

Notes: Authors' analysis of Pregnancy Risk Assessment Monitoring System data from fourteen states and New York City. Sample includes low-income women 100-138 percent of the federal poverty level. Women 18-26 years old are identified using birth year and year of survey, as maternal age is measured through categories that do not align with excluding women under the age of 26, and may therefore not perfectly capture women in this age group. Data are weighted using PRAMS sample weights. Estimates are presented as percentage points. Model is adjusted for marital status, race/ethnicity, educational attainment, state level rates of unemployment for women, and state and year fixed effects. P-values and confidence intervals are derived from wild bootstrap cluster standard errors by state. Boldface indicates  $p < 0.05$ . † $p < 0.10$ , \* $p < 0.05$ , \*\* $p < 0.01$ , \*\*\* $p < 0.001$

**eTable7. Estimates of the Effects of Medicaid versus Marketplace Eligibility on Maternal Coverage and Access to Prenatal and Postpartum Care, Omitting States with Generous Pre-ACA Medicaid Eligibility**

| Dependent Variable:           | Medicaid Non-expansion States<br>(Marketplace Eligible) |                          | Medicaid Expansion States<br>(Medicaid Eligible) |                          | Effects of Medicaid versus Marketplace Eligibility |                                          |
|-------------------------------|---------------------------------------------------------|--------------------------|--------------------------------------------------|--------------------------|----------------------------------------------------|------------------------------------------|
|                               | Pre-policy<br>(N=1,645)                                 | Post-policy<br>(N=2,201) | Pre-policy<br>(N=2,092)                          | Post-policy<br>(N=2,560) | Unadjusted<br>Difference-in-<br>Difference         | Adjusted<br>Difference-in-<br>Difference |
| <b>Preconception Coverage</b> |                                                         |                          |                                                  |                          |                                                    |                                          |
| Medicaid                      | 27.1                                                    | 25.4                     | 26.4                                             | 48.4                     | 23.1**<br>(13.8, 32.7)                             | 23.4**<br>(14.4, 32.1)                   |
|                               |                                                         |                          |                                                  |                          | <b>0.008</b>                                       | <b>0.006</b>                             |
| Private                       | 40.5                                                    | 46.3                     | 35.1                                             | 30.4                     | -10.2**<br>(-14.8, -4.7)                           | -10.5**<br>(-13.9, -6.4)                 |
|                               |                                                         |                          |                                                  |                          | <b>0.004</b>                                       | <b>0.001</b>                             |
| None                          | 30.8                                                    | 27.3                     | 35.2                                             | 18.2                     | -12.8*<br>(-25.9, -0.7)                            | -12.7*<br>(-23.4, -1.5)                  |
|                               |                                                         |                          |                                                  |                          | <b>0.035</b>                                       | <b>0.037</b>                             |
| <b>Postpartum Coverage</b>    |                                                         |                          |                                                  |                          |                                                    |                                          |
| Medicaid                      | 41.7                                                    | 39.5                     | 41.4                                             | 58.0                     | 19.0*<br>(1.8, 41.6)                               | 19.4*<br>(0.8, 36.8)                     |
|                               |                                                         |                          |                                                  |                          | <b>0.026</b>                                       | <b>0.040</b>                             |
| Private                       | 33.1                                                    | 37.3                     | 28.1                                             | 22.7                     | -9.0<br>(-18.9, 5.6)                               | -9.3<br>(-18.4, 4.25)                    |
|                               |                                                         |                          |                                                  |                          | 0.237                                              | 0.228                                    |
| None                          | 24.3                                                    | 22.0                     | 27.7                                             | 15.9                     | -10.3†<br>(-22.5, 1.91)                            | -10.3*<br>(-21.1, -0.1)                  |
|                               |                                                         |                          |                                                  |                          | 0.092                                              | <b>0.042</b>                             |

|                                    |      |      |      |      |              |              |
|------------------------------------|------|------|------|------|--------------|--------------|
| Early Prenatal Care                | 80.8 | 83.4 | 79.2 | 83.6 | 1.6          | 1.2          |
|                                    |      |      |      |      | (-4.3, 6.4)  | (-5.2, 7.9)  |
|                                    |      |      |      |      | 0.510        | 0.685        |
| Kessner Prenatal Care Index        | 75.4 | 74.2 | 63.3 | 67.9 | 5.6*         | 4.7*         |
|                                    |      |      |      |      | (1.1, 12.1)  | (0.3, 10.8)  |
|                                    |      |      |      |      | <b>0.022</b> | <b>0.042</b> |
| Postpartum Check-Up                | 90.4 | 86.9 | 89.1 | 88.0 | 1.3          | 0.9          |
|                                    |      |      |      |      | (-2.8, 5.4)  | (-2.9, 5.2)  |
|                                    |      |      |      |      | 0.560        | 0.741        |
| Effective Postpartum Contraception | 43.5 | 54.2 | 36.5 | 53.3 | 6.0          | 6.6          |
|                                    |      |      |      |      | (-5.5, 21.4) | (-5.1, 23.9) |
|                                    |      |      |      |      | 0.324        | 0.320        |

Notes: Authors' analysis of Pregnancy Risk Assessment Monitoring System data from eleven states. Sample includes low-income women 100-138 percent of the federal poverty level. Data are weighted using PRAMS sample weights. Estimates are presented as percentage points. Model is adjusted for marital status, race/ethnicity, educational attainment, state level rates of unemployment for women, and state and year fixed effects. P-values and confidence intervals are derived from wild bootstrap cluster standard errors by state. Boldface indicates  $p < 0.05$ . † $p < 0.10$ , \* $p < 0.05$ , \*\* $p < 0.01$ , \*\*\* $p < 0.001$

**eTable8. Estimates of the Effects of Medicaid versus Marketplace Eligibility on Maternal Coverage and Access to Prenatal and Postpartum Care , Complete Case Analysis**

| Dependent Variable:           | Medicaid Non-expansion States<br>(Marketplace Eligible) |                          | Medicaid Expansion States<br>(Medicaid Eligible) |                          | Effects of Medicaid versus Marketplace Eligibility  |                                                   |
|-------------------------------|---------------------------------------------------------|--------------------------|--------------------------------------------------|--------------------------|-----------------------------------------------------|---------------------------------------------------|
|                               | Pre-policy<br>(N=1,594)                                 | Post-policy<br>(N=2,138) | Pre-policy<br>(N=2,962)                          | Post-policy<br>(N=3,797) | Unadjusted<br>Difference-in-<br>Difference Estimate | Adjusted<br>Difference-in-<br>Difference Estimate |
| <b>Preconception Coverage</b> |                                                         |                          |                                                  |                          |                                                     |                                                   |
| Medicaid                      | 27.0                                                    | 25.7                     | 32.9                                             | 49.7                     | 19.6**                                              | 19.9**                                            |
|                               |                                                         |                          |                                                  |                          | (11.9, 28.8)                                        | (12.7, 28.6)                                      |
|                               |                                                         |                          |                                                  |                          | <b>0.004</b>                                        | <b>0.003</b>                                      |
| Private                       | 40.8                                                    | 45.8                     | 32.2                                             | 27.5                     | -9.4**                                              | -10.0**                                           |
|                               |                                                         |                          |                                                  |                          | (-12.6, -5.5)                                       | (-12.1, -7.1)                                     |
|                               |                                                         |                          |                                                  |                          | <b>0.002</b>                                        | <b>0.002</b>                                      |
| None                          | 30.7                                                    | 27.6                     | 30.0                                             | 18.9                     | -9.2*                                               | -9.1*                                             |
|                               |                                                         |                          |                                                  |                          | (-21.5, -0.1)                                       | (-20.4, -0.3)                                     |
|                               |                                                         |                          |                                                  |                          | <b>0.047</b>                                        | <b>0.046</b>                                      |
| <b>Postpartum Coverage</b>    |                                                         |                          |                                                  |                          |                                                     |                                                   |
| Medicaid                      | 41.7                                                    | 40.0                     | 46.2                                             | 61.6                     | 17.2*                                               | 17.0*                                             |
|                               |                                                         |                          |                                                  |                          | (2.6, 36.0)                                         | (1.5, 33.2)                                       |
|                               |                                                         |                          |                                                  |                          | <b>0.011</b>                                        | <b>0.017</b>                                      |
| Private                       | 33.1                                                    | 36.5                     | 25.6                                             | 21.1                     | -7.4                                                | -7.7                                              |
|                               |                                                         |                          |                                                  |                          | (-15.9, 5.5)                                        | (-15.8, 4.5)                                      |
|                               |                                                         |                          |                                                  |                          | 0.280                                               | 0.270                                             |
| None                          | 24.3                                                    | 22.2                     | 22.7                                             | 13.3                     | -7.5                                                | -7.1                                              |
|                               |                                                         |                          |                                                  |                          | (-18.5, 4.9)                                        | (-17.4, 3.5)                                      |
|                               |                                                         |                          |                                                  |                          | 0.202                                               | 0.149                                             |

|                                    |      |      |      |      |              |              |
|------------------------------------|------|------|------|------|--------------|--------------|
| Early Prenatal Care                | 80.8 | 83.6 | 80.1 | 83.8 | 1.0          | 0.7          |
|                                    |      |      |      |      | (-3.9, 5.7)  | (-4.4, 7.5)  |
|                                    |      |      |      |      | 0.667        | 0.780        |
| Kessner Prenatal Care Index        | 75.4 | 74.0 | 65.4 | 70.1 | 6.0*         | 5.1*         |
|                                    |      |      |      |      | (0.9, 12.4)  | (0.9, 11.0)  |
|                                    |      |      |      |      | <b>0.033</b> | <b>0.032</b> |
| Postpartum Check-Up                | 90.7 | 87.1 | 89.7 | 87.8 | 0.7          | 0.4          |
|                                    |      |      |      |      | (-3.1, 4.1)  | (-3.2, 3.9)  |
|                                    |      |      |      |      | 0.693        | 0.808        |
| Effective Postpartum Contraception | 43.7 | 54.4 | 36.3 | 51.1 | 4.1          | 5.2          |
|                                    |      |      |      |      | (-7.9, 19.6) | (-5.7, 22.7) |
|                                    |      |      |      |      | 0.481        | 0.421        |

Notes: Authors' analysis of Pregnancy Risk Assessment Monitoring System data from fourteen states and New York City. Sample includes low-income women 100-138 percent of the federal poverty level. Data are weighted using PRAMS sample weights. Estimates are presented as percentage points. Model is adjusted for marital status, race/ethnicity, educational attainment, state level rates of unemployment for women, and state and year fixed effects. P-values and confidence intervals are derived from wild bootstrap cluster standard errors by state. Boldface indicates  $p < 0.05$ . † $p < 0.10$ , \* $p < 0.05$ , \*\* $p < 0.01$ , \*\*\* $p < 0.001$



**eTable9. Estimates of the Effects of Medicaid versus Marketplace Eligibility on Maternal Coverage and Access to Prenatal and Postpartum Care, Excluding Women with PRAMS Follow-Up within 2 Months**

| Dependent Variable:           | Medicaid Non-expansion States<br>(Marketplace Eligible) |                          | Medicaid Expansion States<br>(Medicaid Eligible) |                          | Effects of Medicaid versus Marketplace Eligibility |                                          |
|-------------------------------|---------------------------------------------------------|--------------------------|--------------------------------------------------|--------------------------|----------------------------------------------------|------------------------------------------|
|                               | Pre-policy<br>(N=1,547)                                 | Post-policy<br>(N=2,081) | Pre-policy<br>(N=3,319)                          | Post-policy<br>(N=4,143) | Unadjusted<br>Difference-in-<br>Difference         | Adjusted<br>Difference-in-<br>Difference |
| <b>Preconception Coverage</b> |                                                         |                          |                                                  |                          |                                                    |                                          |
| Medicaid                      | 27.3                                                    | 26.9                     | 33.4                                             | 53.1                     | 19.1**                                             | 19.3**                                   |
|                               |                                                         |                          |                                                  |                          | (11.0, 30.0)                                       | (11.6, 30.3)                             |
|                               |                                                         |                          |                                                  |                          | <b>0.003</b>                                       | <b>0.003</b>                             |
| Private                       | 41.0                                                    | 45.3                     | 32.3                                             | 27.1                     | -8.7**                                             | -9.1*                                    |
|                               |                                                         |                          |                                                  |                          | (-13.7, -1.2)                                      | (-12.8, -3.3)                            |
|                               |                                                         |                          |                                                  |                          | <b>0.006</b>                                       | <b>0.010</b>                             |
| None                          | 30.3                                                    | 26.7                     | 29.2                                             | 15.9                     | -9.3*                                              | -9.1*                                    |
|                               |                                                         |                          |                                                  |                          | (-20.4, -0.7)                                      | (-20.0, -1.6)                            |
|                               |                                                         |                          |                                                  |                          | <b>0.039</b>                                       | <b>0.031</b>                             |
| <b>Postpartum Coverage</b>    |                                                         |                          |                                                  |                          |                                                    |                                          |
| Medicaid                      | 41.5                                                    | 40.0                     | 46.4                                             | 62.2                     | 16.5*                                              | 16.5†                                    |
|                               |                                                         |                          |                                                  |                          | (0.0, 37.9)                                        | (-1.5, 35.3)                             |
|                               |                                                         |                          |                                                  |                          | <b>0.050</b>                                       | 0.094                                    |
| Private                       | 33.1                                                    | 37.2                     | 25.6                                             | 20.9                     | -7.6                                               | -7.9                                     |
|                               |                                                         |                          |                                                  |                          | (-19.2, 8.3)                                       | (-18.6, 7.2)                             |
|                               |                                                         |                          |                                                  |                          | 0.275                                              | 0.257                                    |
| None                          | 24.4                                                    | 21.7                     | 22.2                                             | 12.8                     | -6.5                                               | -6.2                                     |
|                               |                                                         |                          |                                                  |                          | (-17.4, 5.4)                                       | (-17.5, 4.7)                             |
|                               |                                                         |                          |                                                  |                          | 0.240                                              | 0.196                                    |

|                                    |      |      |      |      |              |              |
|------------------------------------|------|------|------|------|--------------|--------------|
| Early Prenatal Care                | 80.8 | 82.4 | 80.1 | 84.2 | 2.1          | 1.7          |
|                                    |      |      |      |      | (-3.7, 6.3)  | (-4.4, 8.2)  |
|                                    |      |      |      |      | 0.377        | 0.538        |
| Kessner Prenatal Care Index        | 75.8 | 73.5 | 65.5 | 70.2 | 6.6*         | 5.6*         |
|                                    |      |      |      |      | (1.3, 12.2)  | (0.7, 10.7)  |
|                                    |      |      |      |      | <b>0.021</b> | <b>0.038</b> |
| Postpartum Check-Up                | 90.0 | 87.1 | 89.3 | 87.6 | 0.9          | 0.6          |
|                                    |      |      |      |      | (-3.0, 5.2)  | (-3.0, 4.8)  |
|                                    |      |      |      |      | 0.702        | 0.795        |
| Effective Postpartum Contraception | 44.3 | 53.7 | 37.2 | 50.7 | 4.3          | 5.5          |
|                                    |      |      |      |      | (-5.3, 18.7) | (-3.4, 22.7) |
|                                    |      |      |      |      | 0.482        | 0.436        |

Notes: Authors' analysis of Pregnancy Risk Assessment Monitoring System data from fourteen states and New York City. Sample includes low-income women 100-138 percent of the federal poverty level. Data are weighted using PRAMS sample weights. Estimates are presented as percentage points. Model is adjusted for marital status, race/ethnicity, educational attainment, state level rates of unemployment for women, and state and year fixed effects. P-values and confidence intervals are derived from wild bootstrap cluster standard errors by state. Boldface indicates  $p < 0.05$ . † $p < 0.10$ , \* $p < 0.05$ , \*\* $p < 0.01$ , \*\*\* $p < 0.001$

**eTable10. Estimates of the Effects of Medicaid versus Marketplace Eligibility on Coverage at Delivery**

| Dependent Variable:  | Medicaid Non-expansion States<br>(Marketplace Eligible) |                          | Medicaid Expansion States<br>(Medicaid Eligible) |                          | Effects of Medicaid versus Marketplace Eligibility     |                                                      |
|----------------------|---------------------------------------------------------|--------------------------|--------------------------------------------------|--------------------------|--------------------------------------------------------|------------------------------------------------------|
|                      | Pre-policy<br>(N=1,645)                                 | Post-policy<br>(N=2,201) | Pre-policy<br>(N=3,389)                          | Post-policy<br>(N=4,197) | Unadjusted<br>Difference-in-<br>Difference<br>Estimate | Adjusted<br>Difference-in-<br>Difference<br>Estimate |
| Coverage at Delivery |                                                         |                          |                                                  |                          |                                                        |                                                      |
| Medicaid             | 56.8                                                    | 55.3                     | 66.5                                             | 70.8                     | 8.4*                                                   | 9.2*                                                 |
|                      |                                                         |                          |                                                  |                          | (1.1, 14.3)                                            | (2.1, 15.2)                                          |
|                      |                                                         |                          |                                                  |                          | <b>0.032</b>                                           | <b>0.031</b>                                         |
| Private              | 38.7                                                    | 40.0                     | 28.5                                             | 24.9                     | -6.1†                                                  | -7.2*                                                |
|                      |                                                         |                          |                                                  |                          | (-11.3, 0.8)                                           | (-12.4, -0.2)                                        |
|                      |                                                         |                          |                                                  |                          | 0.093                                                  | <b>0.044</b>                                         |
| None (Self-Pay)      | 4.1                                                     | 4.4                      | 2.4                                              | 3.5                      | -0.5                                                   | -0.3                                                 |
|                      |                                                         |                          |                                                  |                          | (-2.7, 2.1)                                            | (-3.0, 2.2)                                          |
|                      |                                                         |                          |                                                  |                          | 0.657                                                  | 0.813                                                |

Notes: Authors' analysis of Pregnancy Risk Assessment Monitoring System data from fourteen states and New York City. Sample includes low-income women 100-138 percent of the federal poverty level. Data are weighted using PRAMS sample weights. Model is adjusted for mother's age, marital status, educational attainment, state level rates of unemployment for women, and state and year fixed effects. P-values and confidence intervals are derived from wild bootstrap cluster standard errors by state. Boldface indicates  $p < 0.05$ . † $p < 0.10$ , \* $p < 0.05$ , \*\* $p < 0.01$ , \*\*\* $p < 0.001$

**eTable11. Estimates of the Effects of Medicaid versus Marketplace Eligibility on Number of Prenatal Care Visits**

|                                | Medicaid Non-expansion States<br>(Marketplace Eligible) |                          | Medicaid Expansion States<br>(Medicaid Eligible) |                          | Effects of Medicaid versus Marketplace Eligibility  |                                                   |
|--------------------------------|---------------------------------------------------------|--------------------------|--------------------------------------------------|--------------------------|-----------------------------------------------------|---------------------------------------------------|
|                                | Pre-policy<br>(N=1,645)                                 | Post-policy<br>(N=2,201) | Pre-policy<br>(N=3,389)                          | Post-policy<br>(N=4,197) | Unadjusted<br>Difference-in-<br>Difference Estimate | Adjusted<br>Difference-in-<br>Difference Estimate |
| Number of Prenatal Care Visits | 9.4                                                     | 9.3                      | 8.4                                              | 8.7                      | 0.5*                                                | 0.4*                                              |
|                                |                                                         |                          |                                                  |                          | (0.001, 1.0)                                        | (0.05, 1.0)                                       |
|                                |                                                         |                          |                                                  |                          | <b>0.050</b>                                        | <b>0.030</b>                                      |

Notes: Authors' analysis of Pregnancy Risk Assessment Monitoring System data from fourteen states and New York City. Sample includes low-income women 100-138 percent of the federal poverty level. Number of prenatal care visits are estimates from grouped number of prenatal visits (<= 8; 9-11; 12+). The lowest number is assigned for each category (1,9,12). Data are weighted using PRAMS sample weights. Model is adjusted for mother's age, marital status, educational attainment, state level rates of unemployment for women, and state and year fixed effects. P-values and confidence intervals are derived from wild bootstrap cluster standard errors by state. Boldface indicates p<0.05. †p<0.10, \*p<0.05, \*\*p<0.01, \*\*\*p<0.001

**eTable12. PRAMS Private Coverage Variables Over Time**

| <b>PRAMS Private Coverage Question</b>                                           | <b>PRAMS Survey Year</b> |
|----------------------------------------------------------------------------------|--------------------------|
| health insurance that you or someone else paid for (not from a job)              | 2011                     |
| private health insurance purchased directly from an insurance company            | 2012-2015                |
| private health insurance from the Health Insurance Marketplace or HealthCare.gov | 2016-2018                |

Notes: PRAMS survey responses indicating non-group private insurance changed over the study period. As a result, our ability to capture specific increases in Marketplace coverage are limited by the change in this measure 2011-2018. Examining rates for this non-group private insurance separately from the broader private insurance category resulted in lower reports of non-group private insurance compared to other estimates for this population, such as those presented in Blavin F, Karpman M, Kenney GM, Sommers BD. Medicaid versus marketplace coverage for near-poor adults: Effects on out-of-pocket spending and coverage. *Health Aff (Millwood)*. 2018;37(2):299-307. doi:10.1377/hlthaff.2017.1166. For these reasons, we use a measure of private insurance in our analyses that encompasses all PRAMS private coverage variables.
